# Supplementary material
Source: PubMed Central journal article supplement (PMC4806657)
Supplement: supp_db15-1334_DB151334SupplementaryData.pdf [file supp_db15-1334_DB151334SupplementaryData.pdf]

SUPPLEMENTARY DATA

**Supplementary Figure 1. Sorcin expression levels in islets of SRI-tg mice.** (A-B) Total protein and mRNA were extracted from islets isolated from (A) SRI-tg1 and (B) SRI-tg10 mice (n=3-6 per genotype, 8-11 weeks old) and their respective littermate controls receiving doxycycline in the drinking water from 4 weeks old. Top panels show representative Western blots performed as in (Leclerc, et al., Am J Physiol Endocrinol Metab, 2004, 286(6):E1023-31) using rabbit polyclonal anti-sorcin (1:1000, Farrell, et al., J Biol Chem, 2003, 278(36):34660-6) and mouse monoclonal anti-alpha tubulin (1:20000, Sigma #T5168). Lower panels show qRT-PCR analysis of sorcin and luciferase expression. Values are mean  $\pm$  SEM. Statistics: \*p<0.05, \*\*p<0.01, \*\*\*p<0.001, two-tailed Student's t tests.

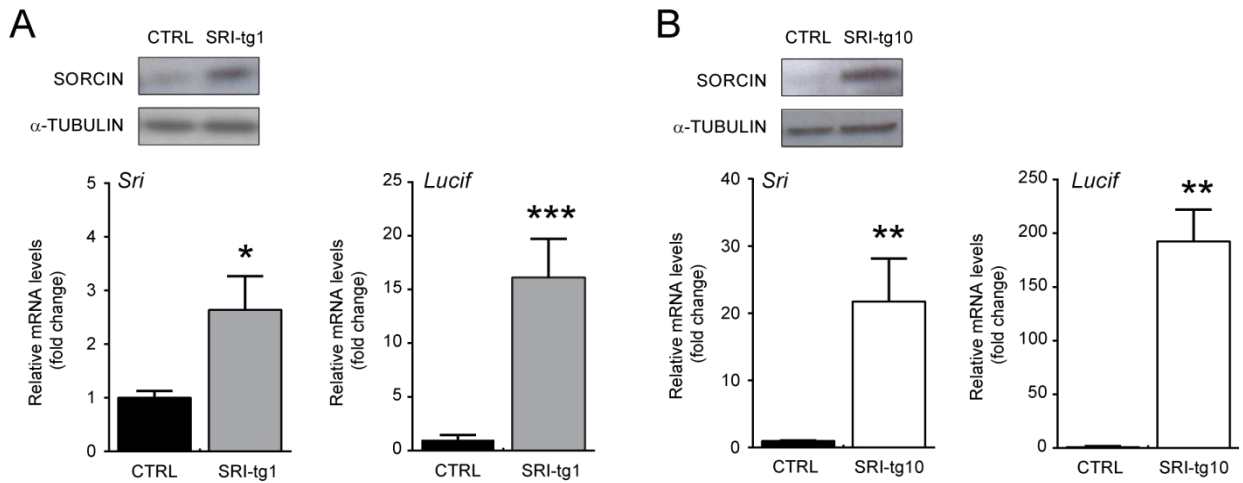

SUPPLEMENTARY DATA

**Supplementary Figure 2. Sorcin phenotype is not apparent *in vivo* in the absence of  $\beta$  cell stress.** (A, C) IPGTTs in SRI-tg1 male mice under standard chow diet (SD) ( $n=10-12$ , 16 and 24 weeks old as indicated). (B, D) IPGTTs in SRI-tg10 female mice under HFD ( $n=7-11$ , 16 and 24 weeks old as indicated). SRI-tg10 females, which are more resistant to diet-induced lipotoxicity than males (Oliveira et al., Ann Anat, 2015, 10.1016/j.aanat.2015.01.007), display an improved glucose tolerance only after 20 weeks of HFD. Right panels represent AUC of blood glucose concentration during IPGTTs. Values are mean  $\pm$  SEM. \*\*\* $p<0.001$ ; Two-way ANOVA.

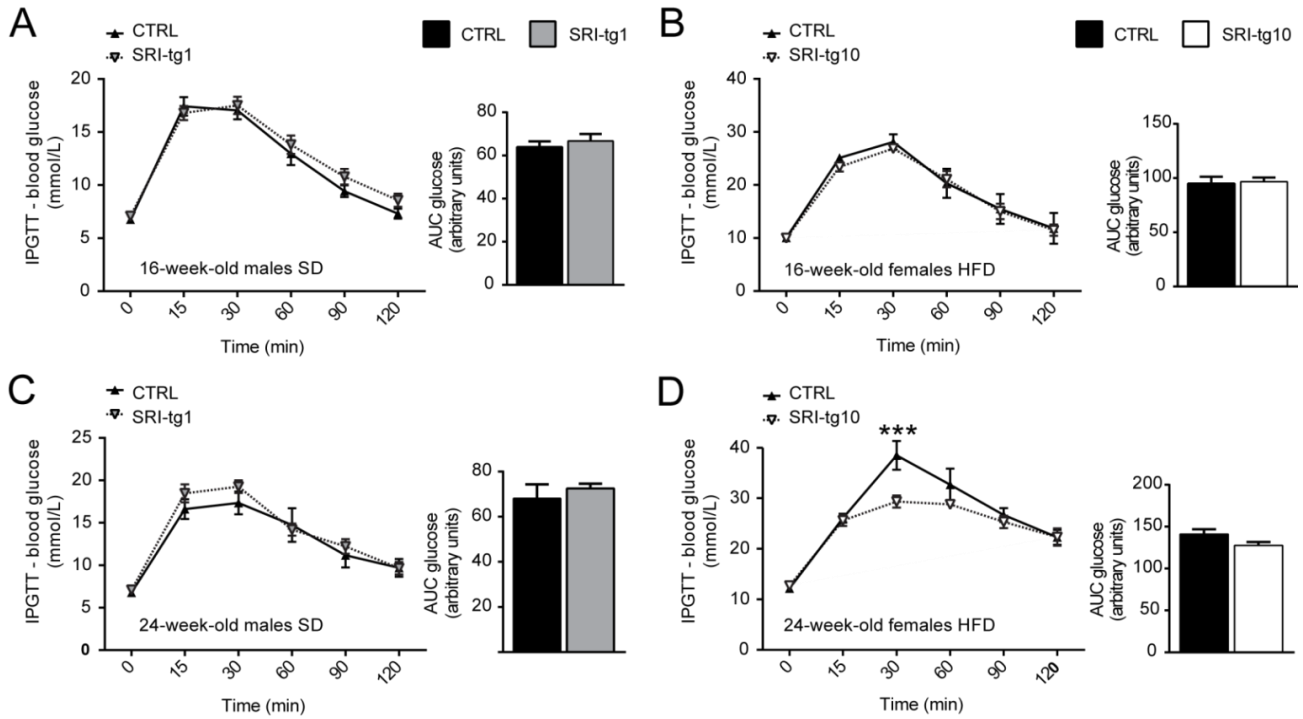

SUPPLEMENTARY DATA

**Supplementary Figure 3. Sorcin overexpression enhances GSIS in isolated islets of SRI-tg1 mice.**

*Ex vivo* insulin secretion assays were performed on isolated islets from HFD-fed SRI-tg1 male mice ( $n=3$ , 17-week-old). Mice were sacrificed by cervical dislocation and pancreatic islets were isolated by *in situ* collagenase digestion and cultured as previously described (Ravier, et al., Methods Mol Biol, 2010). Transgenic islets were cultured overnight in medium supplemented with 0.5 $\mu$ g/ml doxycycline hyclate to sustain transgene expression. Islets were divided into groups of 10 islets per condition and insulin secretion assays were performed as described in (Leclerc, et al., Am J Physiol Endocrinol Metab, 2004, 286(6):E1023-31). Secreted and total insulin content were quantified using HTRF Insulin kit (Cisbio). \* $p<0.05$ , two-tailed Student's t tests.

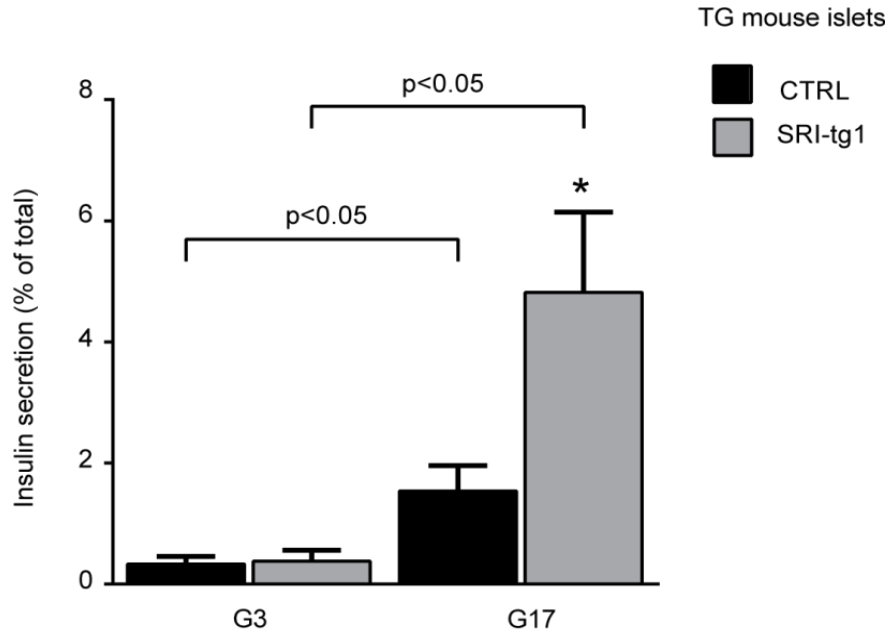

SUPPLEMENTARY DATA

**Supplementary Figure 4. Sorcin overexpression in human islets enhances glucose-induced intracellular  $Ca^{2+}$  oscillations.** Cytosolic free  $Ca^{2+}$  levels ( $[Ca^{2+}]_{cyt}$ ) were measured in islets from human cadaveric donors ( $n=3$ , see Supplemental Table 2 for donors characteristics) transduced with an adenovirus encoding sorcin-GFP or GFP only. Dissociated islets were loaded with Fura-Red (Invitrogen; 4  $\mu$ M) then perfused sequentially with 3 mM glucose (G3), 17 mM glucose (G17), G17 and KCl (20 mM), and G3 as indicated. Different types of responses for glucose-stimulated  $[Ca^{2+}]_{cyt}$  increases were observed and quantified as follows: (i) no response to G17, (ii) low response to G17 (peaks  $> 0.3$  and  $< 4$  % over basal) and (iii) high response to G17 (peaks  $> 4$  % over basal). (A) Representative traces of non-responsive (i), low-responsive (ii) and high-responsive (iii) islets. (B) Quantification of results. \* $p<0.05$ , Two-tailed Student's t-tests.

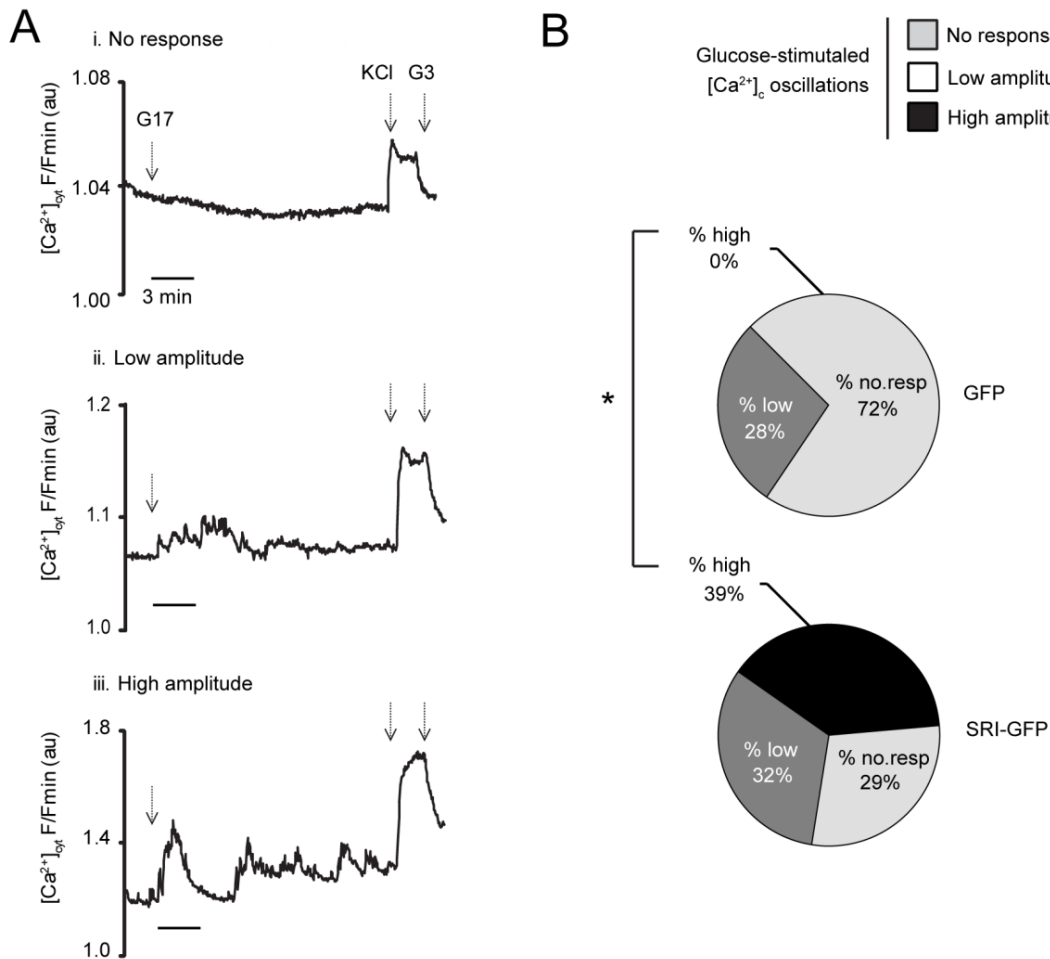

SUPPLEMENTARY DATA

**Supplementary Figure 5. Sorcin overexpression no longer enhances glucose-stimulated cytosolic  $\text{Ca}^{2+}$  levels after ER  $\text{Ca}^{2+}$  depletion.** Cytosolic  $\text{Ca}^{2+}$  levels ( $[\text{Ca}^{2+}]_{\text{cyt}}$ ) were measured in intact islets loaded with Fluo-2 MA AM (Cambridge Bioscience) from HFD-fed SRI-tg10 male mice and littermate controls ( $n=4$ , 11-week-old). The islets were perfused sequentially with 3 mM glucose (G3) in the presence of the SERCA pump inhibitor, cyclopiazonic acid (CPA, 20  $\mu\text{M}$ , Sigma #C1530) to empty the ER, followed by 17 mM glucose (G17) glucose as indicated. Traces represent mean  $\pm$  SEM. The right panel represents AUC of  $[\text{Ca}^{2+}]_c$  after glucose stimulation (time: 13-22 min). Two-tailed Student's t-tests.

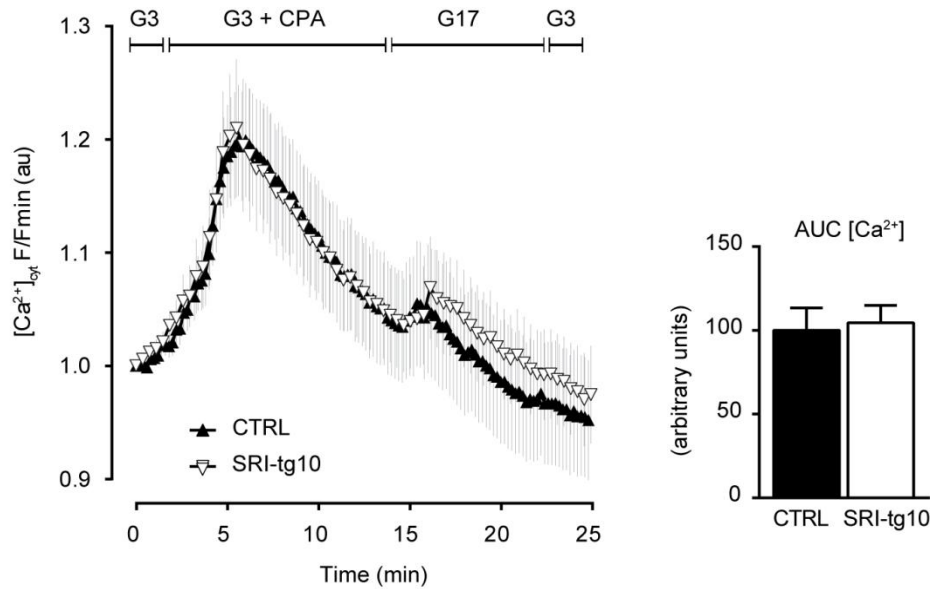

SUPPLEMENTARY DATA

**Supplementary Figure 6. Endogenous sorcin expression in regular chow and high fat fed DBA2/J mice.** Normalised RNA-Seq counts for Sri compared between regular chow and high fat diet fed mice at 30 days, six biological replicates per condition. To obtain counts, reads were mapped to mm9 and summed for all exons of a gene. The gene counts were then normalised using EdgeR and differential expression measured using a moderated t-test in limma (voom method). P-values were corrected for multiple comparisons using the Benjamini Hochberg FDR method. The estimated fold change and corrected p-value are indicated.

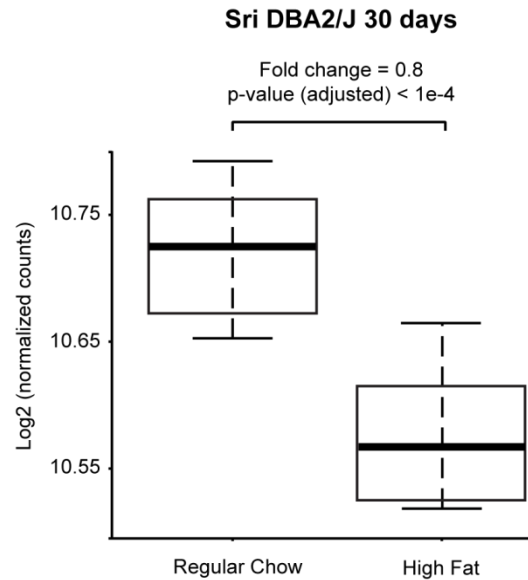

## SUPPLEMENTARY DATA

**Supplementary Figure 7. Effects of diazoxide and cyclosporine A on hG6PC2 promoter activity.** MIN6  $\beta$  cells were co-transfected with pRL-CMV and -1075+124hG6PC2-Luci using Lipofectamine 2000 and OptiMem. After 20h (overnight) the medium was changed for 20 mM Glucose DMEM supplemented with DMSO (0.1%), diazoxide (Diaz, 100  $\mu$ M) or cyclosporin A (CsA, 0.2  $\mu$ M) as indicated for a further 24h before cell lysis and luciferase assays ( $n=3-4$  independent experiments). Values are mean  $\pm$  SEM. \*\* $p<0.005$ , \*\*\* $p<0.001$ , Two-tailed Student's t-tests.

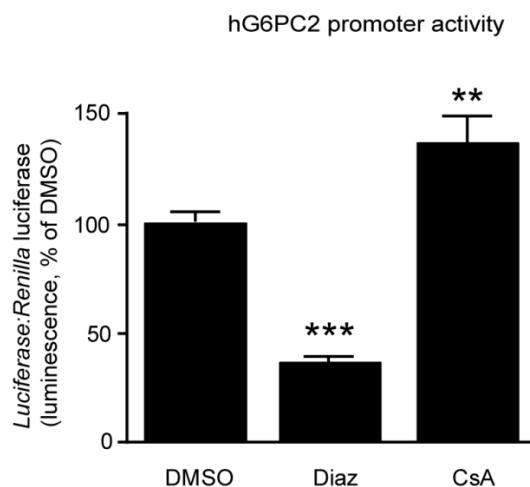

SUPPLEMENTARY DATA

**Supplementary Table 1.** Oligonucleotide sequences used to design pLKO.1-shSc (scrambled), pLKO.1-shSRI144, and pLKO.1-shSRI457 plasmids.

| <b>ShRNA</b>    | <b>Direction</b> | <b>Sequence (5' → 3')</b>                                      |
|-----------------|------------------|----------------------------------------------------------------|
| Scrambled_ShRNA | Forward          | CCGGCCTAAGGTTAAGTCGCCCTCGCTCGAGCGAGGGC<br>GACTTAACCTTAGGTTTT   |
|                 | Reverse          | AATTCAAAAACCTAAGGTTAAGTCGCCCTCGCTCGAGC<br>GAGGGCGACTTAACCTTAGG |
| shRNA_SRI144    | Forward          | CCGGAATTGATGCTGACGAATTGCACTCGAGTGCAATT<br>CGTCAGCATCAATTTTTTTG |
|                 | Reverse          | AATTCAAAAAAATTGATGCTGACGAATTGCACTCGAGT<br>GCAATTCGTCAGCATCAATT |
| ShRNA_SRI457    | Forward          | CCGGAAGATCACGTTTGATGACTACCTCGAGGTAGTCA<br>TCAAACGTGATCTTTTTTTG |
|                 | Reverse          | AATTCAAAAAAAGATCACGTTTGATGACTACCTCGAGG<br>TAGTCATCAAACGTGATCTT |



SUPPLEMENTARY DATA

**Supplementary Table 2.** Characteristics of donor's providing islet samples. Details were provided by the harvesting and processing institution.

| <b>Identifier</b> | <b>Gender</b> | <b>Age</b> | <b>BMI<br/>(kg/m<sup>2</sup>)</b> | <b>Cause of death</b> | <b>Originating facility</b> |
|-------------------|---------------|------------|-----------------------------------|-----------------------|-----------------------------|
| DA1               | Male          | 48         | N/A                               | N/A                   | Edmonton, Canada            |
| DP2               | Female        | 64         | 29.4                              | Cerebral trauma       | Pisa, Italy                 |
| D03               | Female        | 42         | 29                                | N/A                   | Oxford, United Kingdom      |
| DP4               | Female        | 64         | 29.4                              | Cerebral haemorrhage  | Pisa, Italy                 |
| DP5               | Male          | 78         | 23.1                              | Cerebral haemorrhage  | Pisa, Italy                 |
| DM6               | Male          | 61         | 33.8                              | Cerebral bleeding     | Milano, Italy               |
| DG7               | Female        | 60         | 21.5                              | Cerebral haemorrhage  | Geneva, Switzerland         |
| DM8               | Male          | 63         | 24.5                              | Cerebral haemorrhage  | Milano, Italy               |
| DP9               | Male          | 60         | 26.1                              | Cerebral trauma       | Pisa, Italy                 |
| DM10              | Male          | 64         | 23.7                              | Cerebral haemorrhage  | Milano, Italy               |
| DM11              | Male          | 47         | 37.1                              | Cerebral haemorrhage  | Milano, Italy               |
| DA12              | N/A           | N/A        | N/A                               | N/A                   | Edmonton, Canada            |
| DM13              | Male          | 52         | 22.8                              | Cerebral haemorrhage  | Milano, Italy               |

SUPPLEMENTARY DATA

**Supplementary Table 3.** Oligonucleotide sequences of primers used for RT-qPCR.

| Gene                 | NCBI No.       | Direction | Sequence (5' → 3')          |
|----------------------|----------------|-----------|-----------------------------|
| HOMO SAPIENS         |                |           |                             |
| <i>ACTB</i>          | NM_001101.3    | Forward   | TCCCTGGAGAAGAGCTACGA        |
|                      |                | Reverse   | AGCACTGTGTTGGCGTACAG        |
| <i>CHOP</i>          | NM_001195053.1 | Forward   | TCTTGACCCTGCTTCTCTG         |
|                      |                | Reverse   | TCTTCCTCCTCTTCCTCCTG        |
| <i>G6PC2</i>         | NM_021176.2    | Forward   | CTGCCCTGAGCCACACTGT         |
|                      |                | Reverse   | CCAAAAAACAACCTCCAAAGAAATGAC |
| <i>GRP78/BIP</i>     | NM_005347.4    | Forward   | TGGCGGAACCTTCGATGT          |
|                      |                | Reverse   | TGGCCACAACCTTCGAAGACA       |
| <i>SRI</i>           | NM_003130.3    | Forward   | GCACCAGCGGGAAGATCA          |
|                      |                | Reverse   | TGAGAGCCCTCAGTTTGACACA      |
| MUS MUSCULUS         |                |           |                             |
| <i>Actb</i>          | NM_007393.3    | Forward   | TCCCTGGAGAAGAGCTACGA        |
|                      |                | Reverse   | AGCACTGTGTTGGCGTACAG        |
| <i>Chop</i>          | NM_001290183.1 | Forward   | AGGAGCCAGGGCCAACA           |
|                      |                | Reverse   | TCTGGAGAGCGAGGGCTTT         |
| <i>G6pc2</i>         | NM_021331.4    | Forward   | CCCATGTCTTGAGCAGTTTCC       |
|                      |                | Reverse   | ATTGCGTGGCCAGATGGA          |
| <i>GRP78/BIP</i>     | NM_001163434.1 | Forward   | TGGAGTTCCAGATTGAAG          |
|                      |                | Reverse   | CCTGACCCACCTTTTTCTCA        |
| <i>Sri</i>           | NM_025618      | Forward   | GCACCAGCGGGAAGATCA          |
|                      |                | Reverse   | TGAGAGCCCTCAGTTTGACACA      |
| <i>Total Xbp-1</i>   | (1)            | Forward   | TGGCCGGGTCTGCTGAGTCCG       |
|                      |                | Reverse   | GTCCATGGGAAGATGTTCTGG       |
| <i>Spliced Xbp-1</i> | (1)            | Forward   | CTGAGTCCGAATCAGGTGCAG       |
|                      |                | Reverse   | GTCCATGGGAAGATGTTCTGG       |

(1) from Lipson et al, *Cell Metab.* 2006 Sep;4(3):245-54.

SUPPLEMENTARY DATA

**Supplementary Table 4.** Ingenuity Pathway Analysis of microarray dataset. Top ranking networks (score  $\geq 30$ ); 1.5 fold-change cut-off, P-value = 0.01.

| Probe ID | Score | Focus molecules | Up-regulated (at least 1.5 fold)                                                                                      | Down-regulated (at least 1.5 fold)                                                                                                | Top Diseases and Functions                                                                 |
|----------|-------|-----------------|-----------------------------------------------------------------------------------------------------------------------|-----------------------------------------------------------------------------------------------------------------------------------|--------------------------------------------------------------------------------------------|
| 1        | 44    | 25              | BBS1, DHCR24*, DYNC1LI1*, KLHL13, NUDCD3*, NUP133*, SAC3D1, VANGL2                                                    | ALG5*, ANAPC1*, CCDC64*, CCT3*, CDC6*, CDC45, CDK1*, CENPF, HECW2, KIF1C*, LRRC59*, MAD2L1*, NEDD1*, PDCL3, PRC1, RAD54B*, RRP1B* | Cell Cycle, Cellular Assembly and organization, DNA replication, Recombination and Repair  |
| 2        | 40    | 23              | CLDN4, CNGA3*, DLK1*, ECE1*, ERLIN2*, HS6ST1*, IPRP3, MGAT3, PDE7A, PVRL1*, RGS3*, SRI*, WNK4*                        | AMPH*, ATP2B4*, CCP110*, CD200*, ITPR1*, JAM2*, PDE5A*, PLCB4, RGS5, SNAP23                                                       | Molecular Transport, Cellular Assembly and Organization, Cellular Function and Maintenance |
| 3        | 34    | 21              | APOF*, HIST2H2AA3/HIST2H2AA4*, HIST4H4*, INSIG1*, LDLR*, LINGO1, PCOLCE2*, PRKAG3*, RAB3B*, SERPINA1*, SREBF1, ZBTB7C | FABP5*, Gpihbp1*, MKI67, NAP1L1*, PBK, RGCC, SEMA6D*, SLC30A7*, TNFRSF10A*                                                        | Lipid Metabolism, Small Molecule Biochemistry, Vitamin and Mineral Metabolism              |
| 4        | 33    | 20              | AMIGO2*, ANXA4*, CISH, DCK, DDR1, IFI16*, IL7R*, JAK3*, KRT75*, MED19*, MED22*, MSH2*, NEUROG3, TLE3*                 | ALDH7A1, MSH3*, RSL1D1*, SLC2A6, SPPL2A*, TLE3*, TOP2a*                                                                           | Cellular Development, Haematological System Development and Function, Cancer               |
| 5        | 30    | 19              | ADRBK1*, ANXA11*, AQP7*, ASCL1*, CBLC*, DPYSL2*, FOXO3, GNA13*, GSN*, MAP15*, NOSIP*, OBFC1, SETBP1                   | CAV1, DOCK4*, KCNIP2, NOSTRIN*, NRCAM*, SDPR                                                                                      | Cancer, Organismal Injury and Abnormalities, Respiratory Disease                           |
